# Supplementary material for: Identification of Tomato Proteins That Interact With Replication Initiator Protein (Rep) of the Geminivirus TYLCV
Source: Front Plant Sci. 2020 Jul 15;11:1069. doi: 10.3389/fpls.2020.01069 (PMC7373745; doi:10.3389/fpls.2020.01069)
Supplement: Supplementary file 3 [file DataSheet_2.xlsx]

## Sheet: Sheet 1 - String Network - 2 de
String Network - 2 default edge
SUID	coexpression	cooccurrence	databases	EdgeBetweenness	experiments	interaction	interspecies	name	neighborhood	score	selected	shared interaction	shared name	textmining
989			507	48.67727273	74	pp		Solyc01g009630.2.1 (pp) Solyc01g104840.2.1		0.543482	FALSE	pp	Solyc01g009630.2.1 (pp) Solyc01g104840.2.1
990	156		507	9.61006494		pp		Solyc01g009630.2.1 (pp) Solyc03g033600.2.1		0.5839080000000001	FALSE	pp	Solyc01g009630.2.1 (pp) Solyc03g033600.2.1
991	96		514	2.4		pp		Solyc01g009630.2.1 (pp) Solyc04g074040.2.1		0.560656	FALSE	pp	Solyc01g009630.2.1 (pp) Solyc04g074040.2.1
992	76		516	9.61006494		pp		Solyc01g009630.2.1 (pp) Solyc09g064660.2.1		0.5720142880000001	FALSE	pp	Solyc01g009630.2.1 (pp) Solyc09g064660.2.1	43
993	118		516	9.61006494		pp		Solyc01g009630.2.1 (pp) Solyc09g075130.2.1		0.5931757360000001	FALSE	pp	Solyc01g009630.2.1 (pp) Solyc09g075130.2.1	47
994	44		507	6.84253247		pp		Solyc01g009630.2.1 (pp) Solyc10g086400.1.1		0.5814784960000001	FALSE	pp	Solyc01g009630.2.1 (pp) Solyc10g086400.1.1	112
995	948		305	7.9047619	53	pp		Solyc01g087730.2.1 (pp) Solyc02g082000.2.1	334	0.98331510655504	FALSE	pp	Solyc01g087730.2.1 (pp) Solyc02g082000.2.1	268
996	734	0.27	489	10.52380952	196	pp		Solyc01g087730.2.1 (pp) Solyc02g086740.1.1	334	0.963764016814481	FALSE	pp	Solyc01g087730.2.1 (pp) Solyc02g086740.1.1	318
997	842		305	5.46570097	865	pp		Solyc01g087730.2.1 (pp) Solyc03g097950.2.1	202	0.9913405634884	FALSE	pp	Solyc01g087730.2.1 (pp) Solyc03g097950.2.1	268
998	573		305	5.45238095	709	pp		Solyc01g087730.2.1 (pp) Solyc06g036050.2.1		0.91778659852	FALSE	pp	Solyc01g087730.2.1 (pp) Solyc06g036050.2.1	48
999	341		305	20.02380952		pp		Solyc01g087730.2.1 (pp) RPL37		0.66474034	FALSE	pp	Solyc01g087730.2.1 (pp) RPL37	268
1000	948		305	16.07142857	0.82	pp		Solyc01g087730.2.1 (pp) l17	334	0.9968286369376	FALSE	pp	Solyc01g087730.2.1 (pp) l17	268
1001	831		305	5.45238095	596	pp		Solyc01g087730.2.1 (pp) Solyc09g098360.2.1		0.96526526776	FALSE	pp	Solyc01g087730.2.1 (pp) Solyc09g098360.2.1	268
1002	118		305	33.51332001	96	pp		Solyc01g087730.2.1 (pp) Solyc11g069700.1.1		0.48298461831999995	FALSE	pp	Solyc01g087730.2.1 (pp) Solyc11g069700.1.1	67
1003	144		507	24.33333333		pp		MA-1 (pp) Solyc05g009600.2.1		0.5779920000000001	FALSE	pp	MA-1 (pp) Solyc05g009600.2.1
1004	832	42	516	2.0	902	pp		MA-1 (pp) Solyc06g082660.2.1		0.992686727815936	FALSE	pp	MA-1 (pp) Solyc06g082660.2.1	42
1005	0.72		514	55.66666667	902	pp		MA-1 (pp) Solyc07g053650.2.1		0.99278531056	FALSE	pp	MA-1 (pp) Solyc07g053650.2.1	459
1006			507	50.89285714	197	pp		Solyc01g104840.2.1 (pp) Solyc02g062290.2.1		0.6306448929999999	FALSE	pp	Solyc01g104840.2.1 (pp) Solyc02g062290.2.1	67
1007	42		507	48.84307359		pp		Solyc01g104840.2.1 (pp) Solyc02g082000.2.1		0.527706	FALSE	pp	Solyc01g104840.2.1 (pp) Solyc02g082000.2.1
1008	54		507	20.44880952	0.62	pp		Solyc01g104840.2.1 (pp) Solyc03g033600.2.1		0.84244818404	FALSE	pp	Solyc01g104840.2.1 (pp) Solyc03g033600.2.1	111
1009	65	174	507	48.27727273	464	pp		Solyc01g104840.2.1 (pp) Solyc04g074040.2.1		0.80346963791656	FALSE	pp	Solyc01g104840.2.1 (pp) Solyc04g074040.2.1	37
1010			507	43.88354978	0.05	pp		Solyc01g104840.2.1 (pp) Solyc06g036050.2.1		0.53165	FALSE	pp	Solyc01g104840.2.1 (pp) Solyc06g036050.2.1
1011			556	146.78235931	46	pp		Solyc01g104840.2.1 (pp) Solyc07g005880.2.1		0.576424	FALSE	pp	Solyc01g104840.2.1 (pp) Solyc07g005880.2.1
1012	57		0.44	99.94722222		pp		Solyc01g104840.2.1 (pp) Solyc07g053650.2.1		0.47192	FALSE	pp	Solyc01g104840.2.1 (pp) Solyc07g053650.2.1
1013			507	20.44880952	699	pp		Solyc01g104840.2.1 (pp) Solyc09g064660.2.1		0.861846117	FALSE	pp	Solyc01g104840.2.1 (pp) Solyc09g064660.2.1	69
1014			507	20.44880952	664	pp		Solyc01g104840.2.1 (pp) Solyc09g075130.2.1		0.845781712	FALSE	pp	Solyc01g104840.2.1 (pp) Solyc09g075130.2.1	69
1015	193		303	31.21006494	458	pp		Solyc01g104840.2.1 (pp) Solyc09g083080.2.1		0.71190388099	FALSE	pp	Solyc01g104840.2.1 (pp) Solyc09g083080.2.1	55
1016	51		485	56.29862915		pp		Solyc01g104840.2.1 (pp) l17		0.53374681	FALSE	pp	Solyc01g104840.2.1 (pp) l17	46
1017	75		0.3	52.9047619	0.3	pp		Solyc01g104840.2.1 (pp) Solyc10g086400.1.1		0.59252825	FALSE	pp	Solyc01g104840.2.1 (pp) Solyc10g086400.1.1	101
1018	245		0.8	82.0	86	pp		Solyc01g110360.2.1 (pp) PGH1		0.924230314	FALSE	pp	Solyc01g110360.2.1 (pp) PGH1	451
1019	44		507	9.15238095	81	pp		Solyc02g062290.2.1 (pp) Solyc03g033600.2.1		0.585925758288	FALSE	pp	Solyc02g062290.2.1 (pp) Solyc03g033600.2.1	44
1020	49		507	3.65		pp		Solyc02g062290.2.1 (pp) Solyc04g074040.2.1		0.5311570000000001	FALSE	pp	Solyc02g062290.2.1 (pp) Solyc04g074040.2.1
1021			507	9.15238095	62	pp		Solyc02g062290.2.1 (pp) Solyc09g064660.2.1		0.557913096	FALSE	pp	Solyc02g062290.2.1 (pp) Solyc09g064660.2.1	44
1022			507	9.15238095	62	pp		Solyc02g062290.2.1 (pp) Solyc09g075130.2.1		0.537566	FALSE	pp	Solyc02g062290.2.1 (pp) Solyc09g075130.2.1
1023	215		0.36	8.0		pp		CAB1B (pp) psaD		0.5217151999999999	FALSE	pp	CAB1B (pp) psaD	48
1024	113			14.75595238		pp		Solyc02g081810.2.1 (pp) Solyc02g082000.2.1	334	0.5675768560000001	FALSE	pp	Solyc02g081810.2.1 (pp) Solyc02g082000.2.1	268
1025	111			10.70498668		pp		Solyc02g081810.2.1 (pp) Solyc03g097950.2.1	334	0.47246206599999996	FALSE	pp	Solyc02g081810.2.1 (pp) Solyc03g097950.2.1	109
1026	948			33.05617716	0.9	pp		Solyc02g081810.2.1 (pp) Solyc09g083080.2.1	302	0.9981017192	FALSE	pp	Solyc02g081810.2.1 (pp) Solyc09g083080.2.1	477
1027	97			27.80833333		pp		Solyc02g081810.2.1 (pp) l17	334	0.46475577999999995	FALSE	pp	Solyc02g081810.2.1 (pp) l17	0.11
1028	221			13.01720779	596	pp		Solyc02g081810.2.1 (pp) Solyc09g098360.2.1		0.685284	FALSE	pp	Solyc02g081810.2.1 (pp) Solyc09g098360.2.1
1029				28.6017316	491	pp		Solyc02g081810.2.1 (pp) Solyc10g086400.1.1		491	FALSE	pp	Solyc02g081810.2.1 (pp) Solyc10g086400.1.1
1030	225		197	24.87142857		pp		Solyc02g082000.2.1 (pp) Solyc02g086740.1.1	334	0.6966090946000001	FALSE	pp	Solyc02g082000.2.1 (pp) Solyc02g086740.1.1	268
1031	948		507	9.40759241	576	pp		Solyc02g082000.2.1 (pp) Solyc03g097950.2.1	334	0.994700908364032	FALSE	pp	Solyc02g082000.2.1 (pp) Solyc03g097950.2.1	268
1032	948		509	4.4	899	pp		Solyc02g082000.2.1 (pp) Solyc06g036050.2.1		0.998243883508	FALSE	pp	Solyc02g082000.2.1 (pp) Solyc06g036050.2.1	319
1033	848		507	14.37857143	506	pp		Solyc02g082000.2.1 (pp) RPL37		0.967201711776	FALSE	pp	Solyc02g082000.2.1 (pp) RPL37	114
1034	156		507	30.4990343		pp		Solyc02g082000.2.1 (pp) Solyc09g083080.2.1	72	0.6138666239999999	FALSE	pp	Solyc02g082000.2.1 (pp) Solyc09g083080.2.1
1035	948		507	7.9	475	pp		Solyc02g082000.2.1 (pp) l17	334	0.9934386247432	FALSE	pp	Solyc02g082000.2.1 (pp) l17	268
1036	948		305	4.24935065	721	pp		Solyc02g082000.2.1 (pp) Solyc09g098360.2.1		0.99261920008	FALSE	pp	Solyc02g082000.2.1 (pp) Solyc09g098360.2.1	268
1037	0.34		305	47.58918581	506	pp		Solyc02g082000.2.1 (pp) Solyc11g069700.1.1		0.7885842526	FALSE	pp	Solyc02g082000.2.1 (pp) Solyc11g069700.1.1	67
1038	333		197	6.59047619	0.8	pp		Solyc02g086740.1.1 (pp) Solyc03g097950.2.1	334	0.9477776170576	FALSE	pp	Solyc02g086740.1.1 (pp) Solyc03g097950.2.1	268
1039	417		197	40.01428571	0.8	pp		Solyc02g086740.1.1 (pp) l17	334	0.9543543489424	FALSE	pp	Solyc02g086740.1.1 (pp) l17	268
1040			0.29	12.73333333	74	pp		Solyc02g087750.2.1 (pp) Solyc04g056410.2.1		0.63247986	FALSE	pp	Solyc02g087750.2.1 (pp) Solyc04g056410.2.1	441
1041			167	35.09340659	597	pp		Solyc02g087750.2.1 (pp) Solyc06g074780.1.1		0.817044045	FALSE	pp	Solyc02g087750.2.1 (pp) Solyc06g074780.1.1	455
1042	43		507	24.09285714	596	pp		Solyc02g087750.2.1 (pp) pcna		0.900312223108	FALSE	pp	Solyc02g087750.2.1 (pp) pcna	477
1043			576	26.98142136	89	pp		Solyc02g087750.2.1 (pp) Solyc07g005880.2.1		0.653134928	FALSE	pp	Solyc02g087750.2.1 (pp) Solyc07g005880.2.1	102
1044			116	38.4490343	191	pp		Solyc02g087750.2.1 (pp) RAD51		0.602373264	FALSE	pp	Solyc02g087750.2.1 (pp) RAD51	444
1045			305	139.04722222	0.15	pp		Solyc02g087750.2.1 (pp) Solyc07g053650.2.1		0.4482395	FALSE	pp	Solyc02g087750.2.1 (pp) Solyc07g053650.2.1	66
1046	63		305	19.24126984	613	pp		Solyc02g087750.2.1 (pp) sumo		0.829382321215	FALSE	pp	Solyc02g087750.2.1 (pp) sumo	323
1047			301	33.71991342	64	pp		Solyc02g087750.2.1 (pp) Solyc10g008910.1.1		0.5943563199999999	FALSE	pp	Solyc02g087750.2.1 (pp) Solyc10g008910.1.1	0.38
1048	42		507	18.72460317	195	pp		Solyc02g087750.2.1 (pp) Solyc10g081830.1.1		0.6391933601700001	FALSE	pp	Solyc02g087750.2.1 (pp) Solyc10g081830.1.1	51
1049	0.05			24.16277056	901	pp		Solyc02g087750.2.1 (pp) Solyc11g013370.1.1		0.9509059	FALSE	pp	Solyc02g087750.2.1 (pp) Solyc11g013370.1.1	478
1050			293	14.63015873	0.1	pp		Solyc02g087750.2.1 (pp) Solyc11g073260.1.1		0.5666796999999999	FALSE	pp	Solyc02g087750.2.1 (pp) Solyc11g073260.1.1	319
1051			327	47.74981685	208	pp		Solyc02g093110.2.1 (pp) Solyc06g074780.1.1		0.502696072	FALSE	pp	Solyc02g093110.2.1 (pp) Solyc06g074780.1.1	67
1052	146		514	16.7484127	901	pp		Solyc02g093110.2.1 (pp) pcna		0.978263730676	FALSE	pp	Solyc02g093110.2.1 (pp) pcna	471
1053			576	18.94206349	89	pp		Solyc02g093110.2.1 (pp) Solyc07g005880.2.1		0.6322766719999999	FALSE	pp	Solyc02g093110.2.1 (pp) Solyc07g005880.2.1	48
1054	97		116	22.67125652	522	pp		Solyc02g093110.2.1 (pp) RAD51		0.7874685980080001	FALSE	pp	Solyc02g093110.2.1 (pp) RAD51	443
1055	143		897	6.45238095	899	pp		Solyc02g093110.2.1 (pp) sumo		0.995346176338	FALSE	pp	Solyc02g093110.2.1 (pp) sumo	478
1056			507	99.94075369	71	pp		Solyc02g093110.2.1 (pp) Solyc09g083080.2.1		0.542003	FALSE	pp	Solyc02g093110.2.1 (pp) Solyc09g083080.2.1
1057				30.41298701	0.6	pp		Solyc02g093110.2.1 (pp) Solyc11g013370.1.1		0.6468	FALSE	pp	Solyc02g093110.2.1 (pp) Solyc11g013370.1.1	117
1058			415	13.9968254	0.1	pp		Solyc02g093110.2.1 (pp) Solyc11g073260.1.1		0.50509	FALSE	pp	Solyc02g093110.2.1 (pp) Solyc11g073260.1.1	0.06
1059	74		507	9.21006494		pp		Solyc03g033600.2.1 (pp) Solyc04g074040.2.1		0.565851382	FALSE	pp	Solyc03g033600.2.1 (pp) Solyc04g074040.2.1	49
1060	97			42.03268398		pp		Solyc03g033600.2.1 (pp) RPL37	334	0.459343198	FALSE	pp	Solyc03g033600.2.1 (pp) RPL37	101
1061	464		507	2.0	913	pp		Solyc03g033600.2.1 (pp) Solyc09g064660.2.1		0.979447319056	FALSE	pp	Solyc03g033600.2.1 (pp) Solyc09g064660.2.1	106
1062	388		507	2.0	943	pp		Solyc03g033600.2.1 (pp) Solyc09g075130.2.1		0.990988346512	FALSE	pp	Solyc03g033600.2.1 (pp) Solyc09g075130.2.1	476
1063	69		303	32.48387446	599	pp		Solyc03g033600.2.1 (pp) Solyc09g083080.2.1		0.7567020539549999	FALSE	pp	Solyc03g033600.2.1 (pp) Solyc09g083080.2.1	65
1064	948		507	8.25141525	882	pp		Solyc03g097950.2.1 (pp) Solyc06g036050.2.1		0.997168555072	FALSE	pp	Solyc03g097950.2.1 (pp) Solyc06g036050.2.1	64
1065	844		507	24.04308192		pp		Solyc03g097950.2.1 (pp) RPL37		0.947779468	FALSE	pp	Solyc03g097950.2.1 (pp) RPL37	321
1066	948		507	25.2029637	802	pp		Solyc03g097950.2.1 (pp) l17	334	0.997525424188864	FALSE	pp	Solyc03g097950.2.1 (pp) l17	268
1067	842		305	7.33616384	601	pp		Solyc03g097950.2.1 (pp) Solyc09g098360.2.1		0.95903373235	FALSE	pp	Solyc03g097950.2.1 (pp) Solyc09g098360.2.1	65
1068	84		304	7.63333333	269	pp		Solyc04g056410.2.1 (pp) pcna		0.744610728832	FALSE	pp	Solyc04g056410.2.1 (pp) pcna	452
1069	123		574	19.16634199	188	pp		Solyc04g056410.2.1 (pp) Solyc07g005880.2.1		0.717263984032	FALSE	pp	Solyc04g056410.2.1 (pp) Solyc07g005880.2.1	68
1070	133			17.96666667	683	pp		Solyc04g056410.2.1 (pp) RAD51	45	0.865352251315	FALSE	pp	Solyc04g056410.2.1 (pp) RAD51	487
1071	43		302	10.68888889	279	pp		Solyc04g056410.2.1 (pp) sumo		0.518382094	FALSE	pp	Solyc04g056410.2.1 (pp) sumo
1072	64		298	19.68538961	194	pp		Solyc04g056410.2.1 (pp) Solyc10g008910.1.1		0.527596771456	FALSE	pp	Solyc04g056410.2.1 (pp) Solyc10g008910.1.1	108
1073	117		304	4.80793651	58	pp		Solyc04g056410.2.1 (pp) Solyc10g081830.1.1		0.501547248784	FALSE	pp	Solyc04g056410.2.1 (pp) Solyc10g081830.1.1	139
1074	98		514	9.21006494		pp		Solyc04g074040.2.1 (pp) Solyc09g064660.2.1		0.5831082280000001	FALSE	pp	Solyc04g074040.2.1 (pp) Solyc09g064660.2.1	49
1075	71		514	9.21006494		pp		Solyc04g074040.2.1 (pp) Solyc09g075130.2.1		0.570629206	FALSE	pp	Solyc04g074040.2.1 (pp) Solyc09g075130.2.1	49
1076	85		461	8.09253247	464	pp		Solyc04g074040.2.1 (pp) Solyc10g086400.1.1		0.73565284	FALSE	pp	Solyc04g074040.2.1 (pp) Solyc10g086400.1.1
1077	58			64.33333333	257	pp		TUB (pp) Solyc10g008910.1.1		0.6199510420000001	FALSE	pp	TUB (pp) Solyc10g008910.1.1	457
1078			212	82.0	482	pp		TUB (pp) Solyc11g010560.1.1		0.74896684	FALSE	pp	TUB (pp) Solyc11g010560.1.1	385
1079	42			95.66666667	99	pp		TUB (pp) Solyc11g069700.1.1		0.547705208	FALSE	pp	TUB (pp) Solyc11g069700.1.1	476
1080	97		507	24.33333333		pp		Solyc05g009600.2.1 (pp) Solyc06g082660.2.1		0.554821	FALSE	pp	Solyc05g009600.2.1 (pp) Solyc06g082660.2.1
1081	0.13		507	37.0	47	pp		Solyc05g009600.2.1 (pp) Solyc07g053650.2.1		0.59124877	FALSE	pp	Solyc05g009600.2.1 (pp) Solyc07g053650.2.1
1082	49		507	94.6		pp		Solyc05g009600.2.1 (pp) RPL37		0.5311570000000001	FALSE	pp	Solyc05g009600.2.1 (pp) RPL37
1083		277		8.0		pp		Solyc05g020010.1.1 (pp) psaD		0.780208	FALSE	pp	Solyc05g020010.1.1 (pp) psaD	696
1084	0.75		507	9.74404762		pp		Solyc06g036050.2.1 (pp) RPL37		0.88204975	FALSE	pp	Solyc06g036050.2.1 (pp) RPL37	43
1085	948		507	10.06666667	0.49	pp		Solyc06g036050.2.1 (pp) l17		0.99108328648	FALSE	pp	Solyc06g036050.2.1 (pp) l17	318
1086	831		305	5.64935065	0.62	pp		Solyc06g036050.2.1 (pp) Solyc09g098360.2.1		0.9583575043	FALSE	pp	Solyc06g036050.2.1 (pp) Solyc09g098360.2.1	67
1087	136		305	37.74632867		pp		Solyc06g036050.2.1 (pp) Solyc11g069700.1.1		0.5916736	FALSE	pp	Solyc06g036050.2.1 (pp) Solyc11g069700.1.1	0.32
1088	591	496		6.0	912	pp		psaD (pp) Solyc06g082950.2.1		0.989152299136	FALSE	pp	psaD (pp) Solyc06g082950.2.1	402
1089	493			6.0	685	pp		psaD (pp) Solyc08g013670.2.1		0.86744485	FALSE	pp	psaD (pp) Solyc08g013670.2.1	0.17
1090	78			30.3981685	436	pp		Solyc06g074780.1.1 (pp) pcna		0.6463945600000001	FALSE	pp	Solyc06g074780.1.1 (pp) pcna	0.32
1091	339		254	41.67948718	654	pp		Solyc06g074780.1.1 (pp) Solyc10g008910.1.1		0.910768524452	FALSE	pp	Solyc06g074780.1.1 (pp) Solyc10g008910.1.1	477
1092	53			82.0	189	pp		Solyc06g074780.1.1 (pp) Solyc11g008150.1.1		0.47774844000000005	FALSE	pp	Solyc06g074780.1.1 (pp) Solyc11g008150.1.1	0.32
1093	42			5.85714286	183	pp		Solyc06g074780.1.1 (pp) Solyc11g013370.1.1		0.5703053860000001	FALSE	pp	Solyc06g074780.1.1 (pp) Solyc11g013370.1.1	451
1094	948		336	7.90769231	627	pp		Solyc06g074780.1.1 (pp) Solyc11g073260.1.1		0.9932643122879999	FALSE	pp	Solyc06g074780.1.1 (pp) Solyc11g073260.1.1	477
1095	339		577	29.20371573	988	pp		pcna (pp) Solyc07g005880.2.1	82	0.998401424649688	FALSE	pp	pcna (pp) Solyc07g005880.2.1	481
1096	156		491	14.67435897	573	pp		pcna (pp) RAD51	47	0.907172741235844	FALSE	pp	pcna (pp) RAD51	469
1097	96			65.26277056	49	pp		pcna (pp) PGH1	223	0.511031314144	FALSE	pp	pcna (pp) PGH1	268
1098	169		507	12.57222222	901	pp		pcna (pp) sumo		0.976922146927	FALSE	pp	pcna (pp) sumo	431
1099	156			20.04253247	181	pp		pcna (pp) Solyc10g008910.1.1		0.6371011	FALSE	pp	pcna (pp) Solyc10g008910.1.1	475
1100	832		507	11.24920635	74	pp		pcna (pp) Solyc10g081830.1.1		0.958354601968	FALSE	pp	pcna (pp) Solyc10g081830.1.1	457
1101	862			11.38333333	186	pp		pcna (pp) Solyc11g040120.1.1		0.941138032	FALSE	pp	pcna (pp) Solyc11g040120.1.1	476
1102	0.19			7.92222222	45	pp		pcna (pp) Solyc11g073260.1.1		0.51498415	FALSE	pp	pcna (pp) Solyc11g073260.1.1	373
1103	0.41		514	55.66666667	916	pp		Solyc06g082660.2.1 (pp) Solyc07g053650.2.1		0.98364549736	FALSE	pp	Solyc06g082660.2.1 (pp) Solyc07g053650.2.1	321
1104	346			2.0	613	pp		Solyc06g082950.2.1 (pp) Solyc08g013670.2.1		0.855987238	FALSE	pp	Solyc06g082950.2.1 (pp) Solyc08g013670.2.1	431
1105	113		573	19.54300144	197	pp		Solyc07g005880.2.1 (pp) RAD51	53	0.815381572013931	FALSE	pp	Solyc07g005880.2.1 (pp) RAD51	359
1106				11.09888167	247	pp		Solyc07g005880.2.1 (pp) sumo		0.452569	FALSE	pp	Solyc07g005880.2.1 (pp) sumo	273
1107	217		577	21.73333333	902	pp		Solyc07g005880.2.1 (pp) Solyc10g081830.1.1		0.977863315276	FALSE	pp	Solyc07g005880.2.1 (pp) Solyc10g081830.1.1	318
1108	332		134	26.64967532	602	pp		Solyc07g005880.2.1 (pp) Solyc11g040120.1.1	114	0.861082083738016	FALSE	pp	Solyc07g005880.2.1 (pp) Solyc11g040120.1.1	319
1109	116			57.53896104		pp		RAD51 (pp) PGH1	334	0.5690393920000001	FALSE	pp	RAD51 (pp) PGH1	268
1110				15.02460317	606	pp		RAD51 (pp) sumo		0.731292	FALSE	pp	RAD51 (pp) sumo	318
1111				132.43416028	297	pp		RAD51 (pp) l17	127	0.489385792	FALSE	pp	RAD51 (pp) l17	168
1112	158		342	23.74920635	58	pp		RAD51 (pp) Solyc10g081830.1.1		0.6769427164720001	FALSE	pp	RAD51 (pp) Solyc10g081830.1.1	381
1113	171			22.8	49	pp		RAD51 (pp) Solyc11g040120.1.1		0.568756687	FALSE	pp	RAD51 (pp) Solyc11g040120.1.1	453
1114	43		142	22.98547009	99	pp		RAD51 (pp) Solyc11g073260.1.1		0.49914422543799997	FALSE	pp	RAD51 (pp) Solyc11g073260.1.1	323
1115	156			42.03268398		pp		RPL37 (pp) Solyc09g064660.2.1	334	0.49466850400000006	FALSE	pp	RPL37 (pp) Solyc09g064660.2.1	101
1116	108			42.03268398		pp		RPL37 (pp) Solyc09g075130.2.1	334	0.465929272	FALSE	pp	RPL37 (pp) Solyc09g075130.2.1	101
1117	835		507	25.71428571		pp		RPL37 (pp) l17		0.94045546	FALSE	pp	RPL37 (pp) l17	268
1118	421		305	16.20162338		pp		RPL37 (pp) Solyc09g098360.2.1		0.70463473	FALSE	pp	RPL37 (pp) Solyc09g098360.2.1	266
1119	183		305	108.74070097		pp		RPL37 (pp) Solyc11g069700.1.1		0.4662539	FALSE	pp	RPL37 (pp) Solyc11g069700.1.1	0.06
1120	0.22			124.0017316	182	pp		PGH1 (pp) Solyc11g069700.1.1		0.60632932	FALSE	pp	PGH1 (pp) Solyc11g069700.1.1	383
1121				82.0		pp		PGH1 (pp) tdi-65		477	FALSE	pp	PGH1 (pp) tdi-65	477
1122	49		507	68.88571429	67	pp		sumo (pp) Solyc09g083080.2.1		0.5625694809999999	FALSE	pp	sumo (pp) Solyc09g083080.2.1
1123	72		338	24.48777056		pp		sumo (pp) Solyc10g008910.1.1		0.581637184	FALSE	pp	sumo (pp) Solyc10g008910.1.1	319
1124	75		481	12.21111111		pp		sumo (pp) Solyc11g073260.1.1		0.55160995	FALSE	pp	sumo (pp) Solyc11g073260.1.1	66
1125	385		516	2.0	953	pp		Solyc09g064660.2.1 (pp) Solyc09g075130.2.1		0.9926832195399999	FALSE	pp	Solyc09g064660.2.1 (pp) Solyc09g075130.2.1	477
1126	94		303	32.48387446	599	pp		Solyc09g064660.2.1 (pp) Solyc09g083080.2.1		0.8275542639579999	FALSE	pp	Solyc09g064660.2.1 (pp) Solyc09g083080.2.1	319
1127	78		303	32.48387446	599	pp		Solyc09g075130.2.1 (pp) Solyc09g083080.2.1		0.758538628742	FALSE	pp	Solyc09g075130.2.1 (pp) Solyc09g083080.2.1	63
1128	636		305	30.38691309	905	pp		Solyc09g083080.2.1 (pp) Solyc09g098360.2.1		0.9770003233	FALSE	pp	Solyc09g083080.2.1 (pp) Solyc09g098360.2.1	43
1129	845		305	12.26839827	214	pp		l17 (pp) Solyc09g098360.2.1		0.9380202058	FALSE	pp	l17 (pp) Solyc09g098360.2.1	268
1130	505		305	38.95671828		pp		l17 (pp) Solyc11g069700.1.1		0.6766165	FALSE	pp	l17 (pp) Solyc11g069700.1.1	0.06
1131	214		305	32.58951049	86	pp		Solyc09g098360.2.1 (pp) Solyc11g069700.1.1		0.5007092199999998	FALSE	pp	Solyc09g098360.2.1 (pp) Solyc11g069700.1.1
1132				26.53852814	101	pp		Solyc10g008910.1.1 (pp) Solyc11g013370.1.1		0.44172100000000003	FALSE	pp	Solyc10g008910.1.1 (pp) Solyc11g013370.1.1	379
1133	87		135	24.76872294	627	pp		Solyc10g008910.1.1 (pp) Solyc11g040120.1.1		0.800572802855	FALSE	pp	Solyc10g008910.1.1 (pp) Solyc11g040120.1.1	323
1134	75			101.75567766		pp		Solyc10g008910.1.1 (pp) Solyc11g069700.1.1		0.4265	FALSE	pp	Solyc10g008910.1.1 (pp) Solyc11g069700.1.1	0.38
1135	0.72		286	15.8	619	pp		Solyc10g008910.1.1 (pp) Solyc11g073260.1.1		0.96016334104	FALSE	pp	Solyc10g008910.1.1 (pp) Solyc11g073260.1.1	477
1136	507		507	5.83571429	487	pp		Solyc10g081830.1.1 (pp) Solyc11g040120.1.1		0.883420331905	FALSE	pp	Solyc10g081830.1.1 (pp) Solyc11g040120.1.1	65
3405						interacts with		Solyc10g081830.1.1 (pp) Solyc11g040120.1.1 with) Rep			FALSE	pp	Rep (interacts with) Rep
7667						interacts with		Rep (interacts with) 4081.Solyc01g009630.2.1			FALSE	interacts with	Rep (interacts with) 4081.Solyc01g009630.2.1
7669						interacts with		Rep (interacts with) 4081.Solyc10g086400.1.1			FALSE	interacts with	Rep (interacts with) 4081.Solyc10g086400.1.1
7671						interacts with		4081.Solyc02g062290.2.1 (interacts with) Rep			FALSE	interacts with	4081.Solyc02g062290.2.1 (interacts with) Rep
7673						interacts with		Rep (interacts with) 4081.Solyc04g074040.2.1			FALSE	interacts with	Rep (interacts with) 4081.Solyc04g074040.2.1
7675						interacts with		Rep (interacts with) 4081.Solyc09g064660.2.1			FALSE	interacts with	Rep (interacts with) 4081.Solyc09g064660.2.1
7677						interacts with		4081.Solyc09g075130.2.1 (interacts with) Rep			FALSE	interacts with	4081.Solyc09g075130.2.1 (interacts with) Rep
7679						interacts with		4081.Solyc03g033600.2.1 (interacts with) Rep			FALSE	interacts with	4081.Solyc03g033600.2.1 (interacts with) Rep
7681						interacts with		Rep (interacts with) 4081.Solyc01g104840.2.1			FALSE	interacts with	Rep (interacts with) 4081.Solyc01g104840.2.1
7683						interacts with		Rep (interacts with) 4081.Solyc09g083080.2.1			FALSE	interacts with	Rep (interacts with) 4081.Solyc09g083080.2.1
7685						interacts with		Rep (interacts with) 4081.Solyc02g081810.2.1			FALSE	interacts with	Rep (interacts with) 4081.Solyc02g081810.2.1
7687						interacts with		Rep (interacts with) 4081.Solyc09g098360.2.1			FALSE	interacts with	Rep (interacts with) 4081.Solyc09g098360.2.1
7689						interacts with		Rep (interacts with) 4081.Solyc02g082000.2.1			FALSE	interacts with	Rep (interacts with) 4081.Solyc02g082000.2.1
7691						interacts with		Rep (interacts with) 4081.Solyc08g068180.2.1			FALSE	interacts with	Rep (interacts with) 4081.Solyc08g068180.2.1
7693						interacts with		Rep (interacts with) 4081.Solyc09g090610.2.1			FALSE	interacts with	Rep (interacts with) 4081.Solyc09g090610.2.1
7695						interacts with		Rep (interacts with) 4081.Solyc06g036050.2.1			FALSE	interacts with	Rep (interacts with) 4081.Solyc06g036050.2.1
7697						interacts with		Rep (interacts with) 4081.Solyc01g087730.2.1			FALSE	interacts with	Rep (interacts with) 4081.Solyc01g087730.2.1
7699						interacts with		Rep (interacts with) 4081.Solyc03g097950.2.1			FALSE	interacts with	Rep (interacts with) 4081.Solyc03g097950.2.1
7701						interacts with		Rep (interacts with) 4081.Solyc11g069700.1.1			FALSE	interacts with	Rep (interacts with) 4081.Solyc11g069700.1.1
7703						interacts with		Rep (interacts with) 4081.Solyc02g086740.1.1			FALSE	interacts with	Rep (interacts with) 4081.Solyc02g086740.1.1
7705						interacts with		Rep (interacts with) 4081.Solyc07g053650.2.1			FALSE	interacts with	Rep (interacts with) 4081.Solyc07g053650.2.1
7707						interacts with		Rep (interacts with) 4081.Solyc05g009600.2.1			FALSE	interacts with	Rep (interacts with) 4081.Solyc05g009600.2.1
7709						interacts with		Rep (interacts with) 4081.Solyc01g099760.2.1			FALSE	interacts with	Rep (interacts with) 4081.Solyc01g099760.2.1
7711						interacts with		Rep (interacts with) 4081.Solyc06g082660.2.1			FALSE	interacts with	Rep (interacts with) 4081.Solyc06g082660.2.1
7713						interacts with		Rep (interacts with) 4081.Solyc04g056410.2.1			FALSE	interacts with	Rep (interacts with) 4081.Solyc04g056410.2.1
7715						interacts with		Rep (interacts with) 4081.Solyc07g005880.2.1			FALSE	interacts with	Rep (interacts with) 4081.Solyc07g005880.2.1
7717						interacts with		Rep (interacts with) 4081.Solyc10g081830.1.1			FALSE	interacts with	Rep (interacts with) 4081.Solyc10g081830.1.1
7719						interacts with		4081.Solyc11g040120.1.1 (interacts with) Rep			FALSE	interacts with	4081.Solyc11g040120.1.1 (interacts with) Rep
7721						interacts with		Rep (interacts with) 4081.Solyc06g076660.2.1			FALSE	interacts with	Rep (interacts with) 4081.Solyc06g076660.2.1
7723						interacts with		4081.Solyc07g017540.2.1 (interacts with) Rep			FALSE	interacts with	4081.Solyc07g017540.2.1 (interacts with) Rep
7725						interacts with		Rep (interacts with) 4081.Solyc02g093110.2.1			FALSE	interacts with	Rep (interacts with) 4081.Solyc02g093110.2.1
7727						interacts with		Rep (interacts with) 4081.Solyc10g008910.1.1			FALSE	interacts with	Rep (interacts with) 4081.Solyc10g008910.1.1
7729						interacts with		4081.Solyc02g087750.2.1 (interacts with) Rep			FALSE	interacts with	4081.Solyc02g087750.2.1 (interacts with) Rep
7731						interacts with		Rep (interacts with) 4081.Solyc09g059970.2.1			FALSE	interacts with	Rep (interacts with) 4081.Solyc09g059970.2.1
7733						interacts with		Rep (interacts with) 4081.Solyc11g013370.1.1			FALSE	interacts with	Rep (interacts with) 4081.Solyc11g013370.1.1
7735						interacts with		4081.Solyc11g073260.1.1 (interacts with) Rep			FALSE	interacts with	4081.Solyc11g073260.1.1 (interacts with) Rep
7737						interacts with		Rep (interacts with) 4081.Solyc06g074780.1.1			FALSE	interacts with	Rep (interacts with) 4081.Solyc06g074780.1.1
7739						interacts with		Rep (interacts with) 4081.Solyc09g009020.2.1			FALSE	interacts with	Rep (interacts with) 4081.Solyc09g009020.2.1
7741						interacts with		Rep (interacts with) 4081.Solyc04g081490.2.1			FALSE	interacts with	Rep (interacts with) 4081.Solyc04g081490.2.1
7743						interacts with		Rep (interacts with) 4081.Solyc11g008150.1.1			FALSE	interacts with	Rep (interacts with) 4081.Solyc11g008150.1.1
7745						interacts with		Rep (interacts with) 4081.Solyc11g010560.1.1			FALSE	interacts with	Rep (interacts with) 4081.Solyc11g010560.1.1
7747						interacts with		Rep (interacts with) 4081.Solyc01g110360.2.1			FALSE	interacts with	Rep (interacts with) 4081.Solyc01g110360.2.1
7749						interacts with		Rep (interacts with) 4081.Solyc12g088670.1.1			FALSE	interacts with	Rep (interacts with) 4081.Solyc12g088670.1.1
7751						interacts with		Rep (interacts with) 4081.Solyc05g020010.1.1			FALSE	interacts with	Rep (interacts with) 4081.Solyc05g020010.1.1
7753						interacts with		4081.Solyc06g054260.1.1 (interacts with) Rep			FALSE	interacts with	4081.Solyc06g054260.1.1 (interacts with) Rep
7755						interacts with		Rep (interacts with) 4081.Solyc06g082950.2.1			FALSE	interacts with	Rep (interacts with) 4081.Solyc06g082950.2.1
7757						interacts with		Rep (interacts with) 4081.Solyc08g013670.2.1			FALSE	interacts with	Rep (interacts with) 4081.Solyc08g013670.2.1
7759						interacts with		Rep (interacts with) 4081.Solyc02g070940.1.1			FALSE	interacts with	Rep (interacts with) 4081.Solyc02g070940.1.1
7761						interacts with		Rep (interacts with) 4081.Solyc12g005770.1.1			FALSE	interacts with	Rep (interacts with) 4081.Solyc12g005770.1.1
7763						interacts with		Rep (interacts with) 4081.Solyc10g081970.1.1			FALSE	interacts with	Rep (interacts with) 4081.Solyc10g081970.1.1
7765						interacts with		Rep (interacts with) 4081.Solyc12g057060.1.1			FALSE	interacts with	Rep (interacts with) 4081.Solyc12g057060.1.1
7767						interacts with		4081.Solyc01g009860.2.1 (interacts with) Rep			FALSE	interacts with	4081.Solyc01g009860.2.1 (interacts with) Rep
7769						interacts with		Rep (interacts with) 4081.Solyc01g009990.2.1			FALSE	interacts with	Rep (interacts with) 4081.Solyc01g009990.2.1
7771						interacts with		4081.Solyc07g042700.2.1 (interacts with) Rep			FALSE	interacts with	4081.Solyc07g042700.2.1 (interacts with) Rep
7773						interacts with		Rep (interacts with) 4081.Solyc05g050120.2.1			FALSE	interacts with	Rep (interacts with) 4081.Solyc05g050120.2.1
7775						interacts with		4081.Solyc03g115850.2.1 (interacts with) Rep			FALSE	interacts with	4081.Solyc03g115850.2.1 (interacts with) Rep
7777						interacts with		Rep (interacts with) 4081.Solyc01g108600.2.1			FALSE	interacts with	Rep (interacts with) 4081.Solyc01g108600.2.1
7779						interacts with		4081.Solyc11g069310.1.1 (interacts with) Rep			FALSE	interacts with	4081.Solyc11g069310.1.1 (interacts with) Rep
7781						interacts with		Rep (interacts with) 4081.Solyc02g091960.2.1			FALSE	interacts with	Rep (interacts with) 4081.Solyc02g091960.2.1
7783						interacts with		Rep (interacts with) 4081.Solyc01g088510.2.1			FALSE	interacts with	Rep (interacts with) 4081.Solyc01g088510.2.1
7785						interacts with		Rep (interacts with) 4081.Solyc01g095670.2.1			FALSE	interacts with	Rep (interacts with) 4081.Solyc01g095670.2.1
7787						interacts with		Rep (interacts with) 4081.Solyc12g098490.1.1			FALSE	interacts with	Rep (interacts with) 4081.Solyc12g098490.1.1
7789						interacts with		Rep (interacts with) 4081.Solyc07g052350.2.1			FALSE	interacts with	Rep (interacts with) 4081.Solyc07g052350.2.1
7791						interacts with		Rep (interacts with) 4081.Solyc04g040180.2.1			FALSE	interacts with	Rep (interacts with) 4081.Solyc04g040180.2.1
7793						interacts with		Rep (interacts with) 4081.Solyc11g013260.1.1			FALSE	interacts with	Rep (interacts with) 4081.Solyc11g013260.1.1
7795						interacts with		Rep (interacts with) 4081.Solyc05g018340.2.1			FALSE	interacts with	Rep (interacts with) 4081.Solyc05g018340.2.1
7797						interacts with		Rep (interacts with) 4081.Solyc12g056830.1.1			FALSE	interacts with	Rep (interacts with) 4081.Solyc12g056830.1.1
7799						interacts with		4081.Solyc06g060230.2.1 (interacts with) Rep			FALSE	interacts with	4081.Solyc06g060230.2.1 (interacts with) Rep
